# Supplementary material
Source: publisher figshare collection journal article supplement (https://acs.figshare.com/ndownloader/files/9605734)
Supplement: Supplementary file 1 [file 9605734]

## Supporting Information

### Enzymatic Catalysis at Nanoscale: Enzyme-coated Nanoparticles as Colloidal Biocatalysts for Polymerization Reactions

Lucas Philipp Kreuzer<sup>1</sup>, Max Julius Männel<sup>1,4</sup>, Jonas Schubert<sup>1,4</sup>, Roland P. M. Höller<sup>1,4</sup>, Munish Chanana<sup>1,2,3\*</sup>

<sup>1</sup> Physical Chemistry II, University of Bayreuth, Universitätsstr. 30, 95440, Bayreuth, Germany.

<sup>2</sup> Institute of Building Materials, ETH Zürich, Stefano-Franscini-Platz 3, 8093, Zürich, Switzerland.

<sup>3</sup> Laboratory for Applied Wood Materials, EMPA Dübendorf, Ueberlandstr. 129, 8600, Dübendorf, Switzerland.

<sup>4</sup> Leibniz Institute for Polymer Research, Hohe Str. 6, 01069, Dresden, Germany

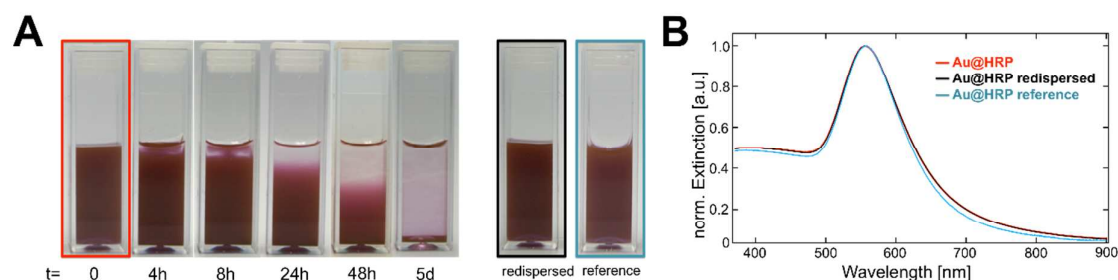

**Figure S1.** Sedimentation behavior of larger Au@HRP NPs ( $d \sim 100$  nm). A) Sedimentation of Au@HRP NPs that were used for the ATRP reaction over time. After 5 days, the gold NP sediment completely and can be redispersed completely, without any aggregation, as revealed by the LSPR band (B). UV-Vis spectra of Au@HRP (red), redispersed Au@HRP (black) and a reference (light blue). The reference is the Au@HRP dispersion that was not used for the ATRP reaction. The corresponding images of the nanoparticle dispersions are framed with the color of the graphs.



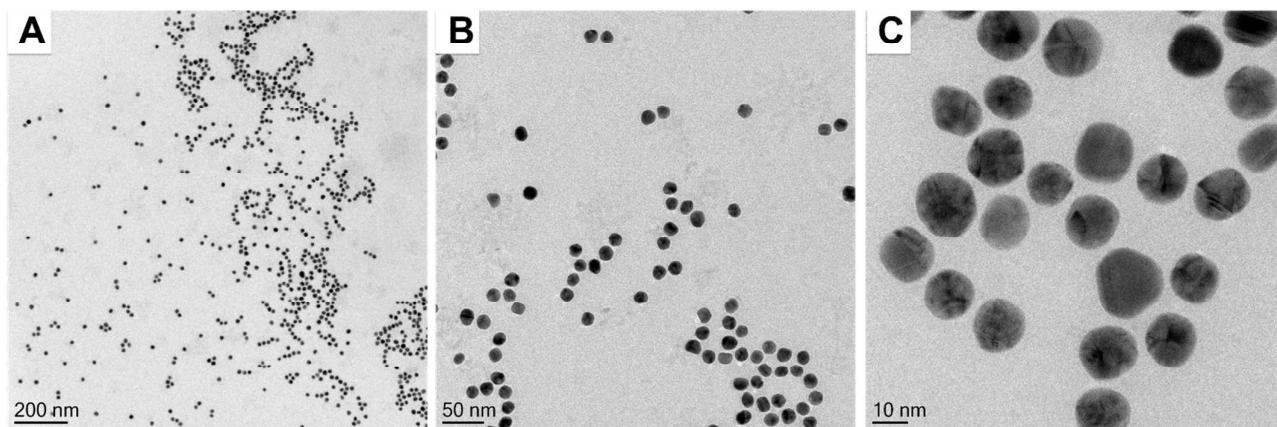

**Figure S2.** TEM images of citrate-stabilized 15 nm gold nanoparticles. The scale bar corresponds to 200 nm (A), 50 nm (B) and 10 nm (C).

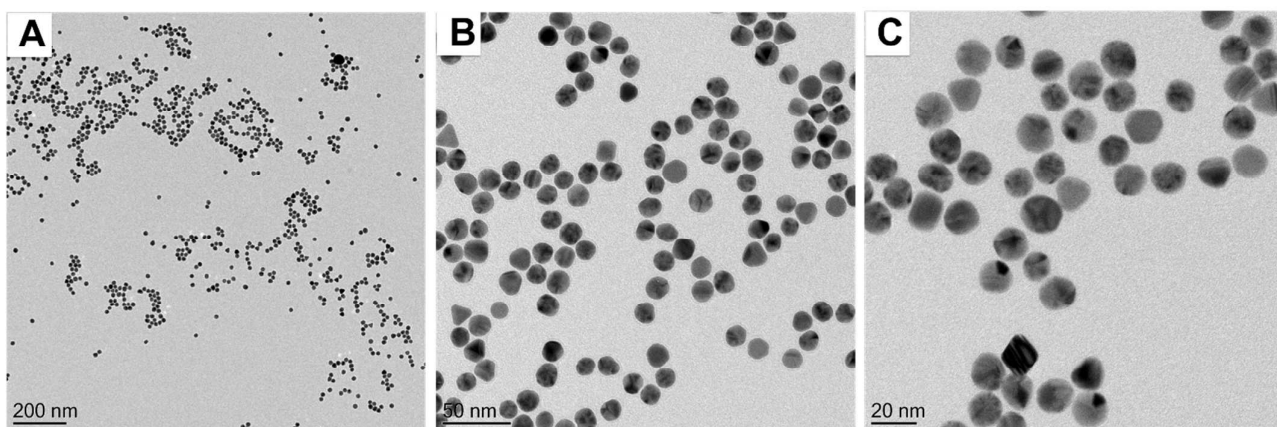

**Figure S3.** TEM images of HRP-coated 15 nm gold nanoparticles. The scale bar corresponds to 200 nm (A), 50 nm (B) and 20 nm (C).



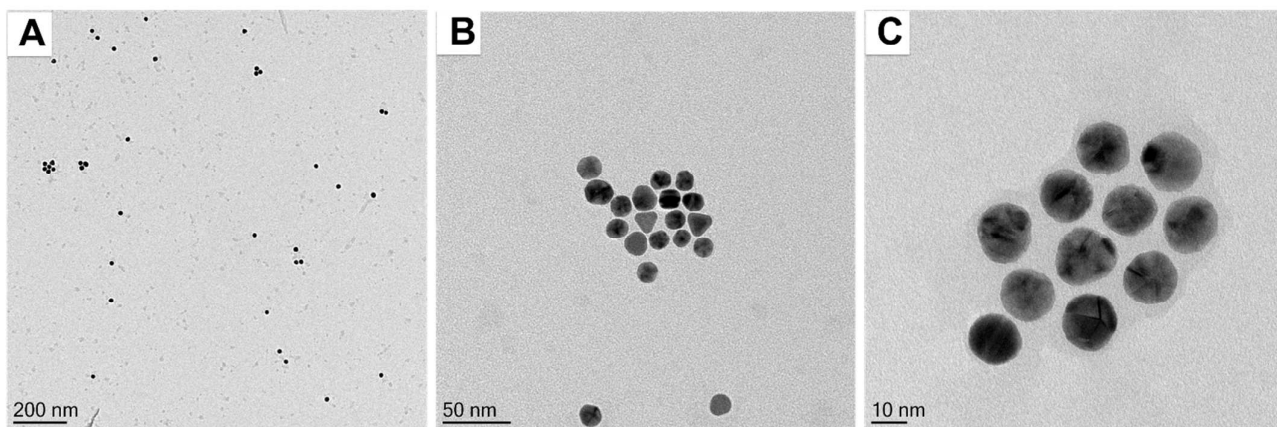

**Figure S4.** TEM images of HRP-coated 15 nm gold nanoparticles after 3 full polymerization and recovery cycles. The scale bar corresponds to 200 nm (A), 50 nm (B) and 10 nm (C).

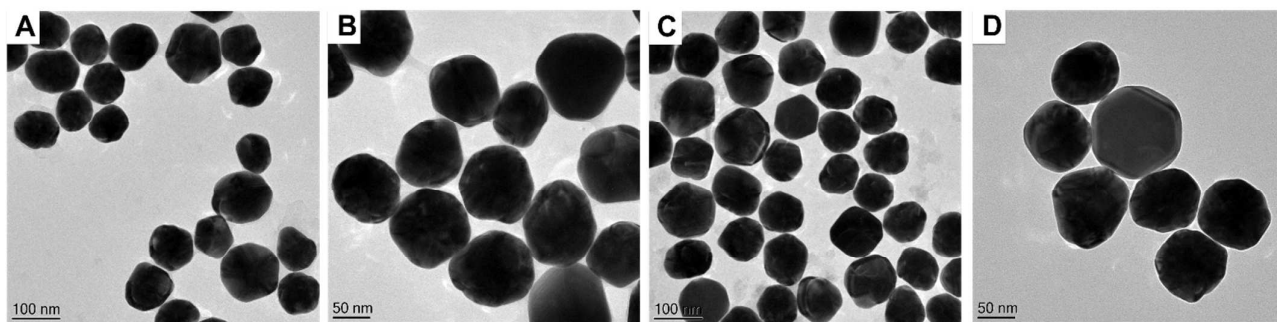

**Figure S5.** TEM images of HRP-coated ~100 nm gold nanoparticles before (A and B) and after 3 full polymerization and recovery cycles (C and D). The scale bars corresponds to 100 nm (A, C) and 50 nm (B, D). The average size of the nanoparticles is  $98.7 \pm 18.74$  nm.



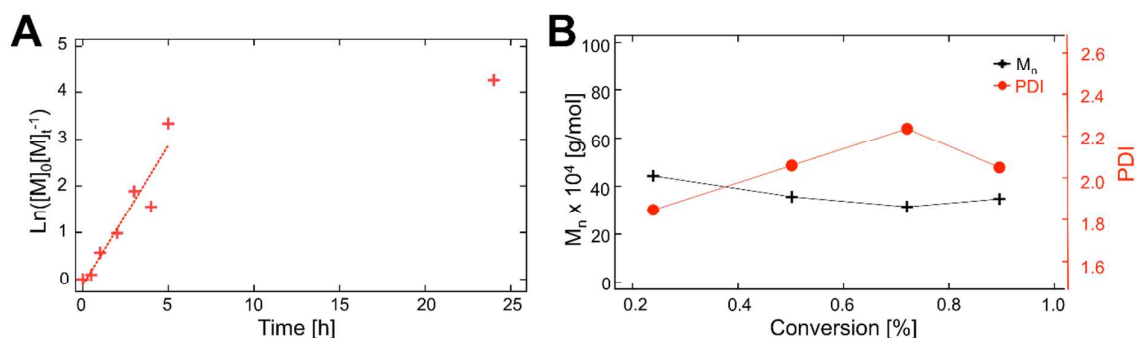

**Figure S6.** Kinetic measurements of ATRP of PEGA: A) Kinetic plot. Negative normal logarithm as function of reaction time. B) Molecular weight (+) and PDI (●) as function of conversion. <sup>1</sup>H-NMR data: <sup>1</sup>H NMR (300 MHz, DMSO-d<sub>6</sub>, δ): 6.25 (d, J=15Hz, 1H, C=CH<sub>2</sub>), 6.10 (m, 1H, CH<sub>2</sub>=CH), 5.90 (d, J=9Hz, 1H, C=CH<sub>2</sub>), 3.58-3.45 (m, 32H, [-O-CH<sub>2</sub>-CH<sub>2</sub>-O]<sub>8</sub>), 3.2 (s, 3H, CH<sub>3</sub>)

**Table 1.** GPC results of the ATRP of NIPAAM and DEGMA using Au15@HRP (overall 3 polymerization cycles)

|       | PNIPAAM                |                        |         | PDEGMA                 |                        |         |
|-------|------------------------|------------------------|---------|------------------------|------------------------|---------|
| cycle | M <sub>n</sub> [g/mol] | M <sub>w</sub> [g/mol] | PDI     | M <sub>n</sub> [g/mol] | M <sub>w</sub> [g/mol] | PDI     |
| 1     | 42900±5750             | 104000±16000           | 2.4±0.1 | 20000±2780             | 35700±5850             | 1.8±0.1 |
| 2     | 28300±6510             | 77100±19500            | 2.7±0.3 | 20100±2930             | 28800±12300            | 1.9±0.1 |
| 3     | 35200±3260             | 81900±11500            | 2.3±0.1 | 21000±1130             | 36900±2090             | 1.8±0.2 |

The constant values for molecular weight and PDI, the high colloidal stability as well as the nearly full recovery of the Au15@HRP NPs suggest clearly that more than three ATRP cycles can be realized with the same HRP-coated gold NP dispersions.
